# Supplementary material
Source: PubMed Central journal article supplement (PMC1555618)

A) GSweight versus intramodular connectivity

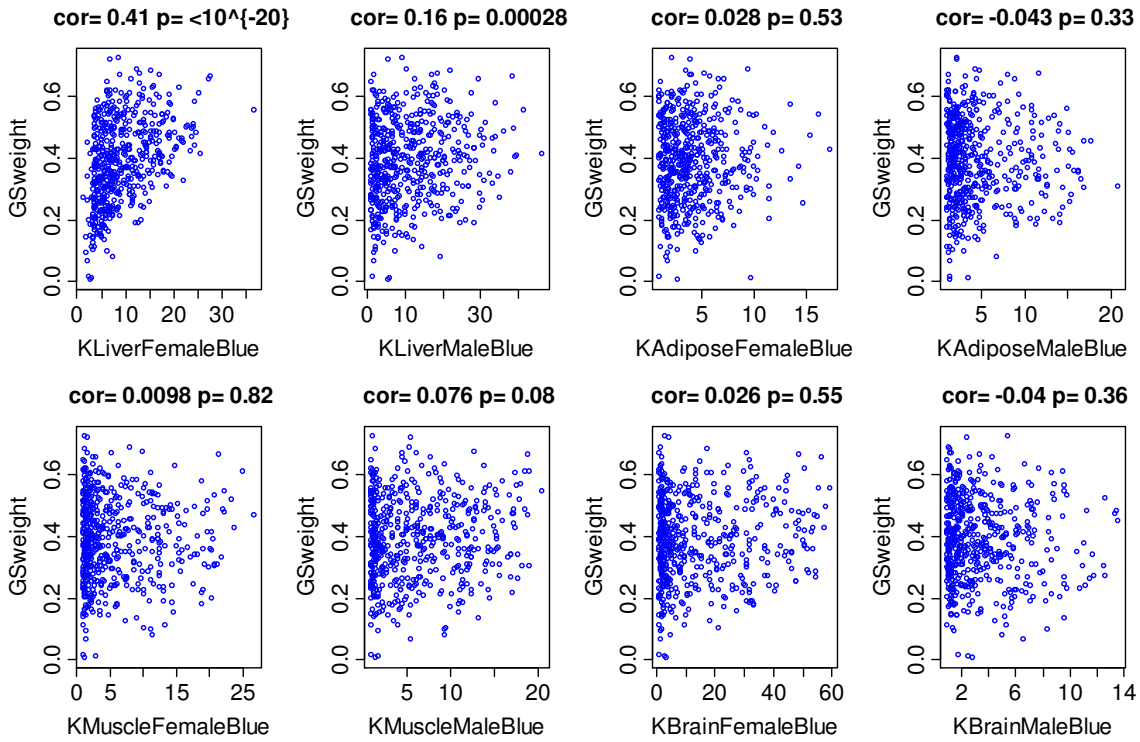

B) Connectivity versus intramodular connectivity in the female mouse liver network

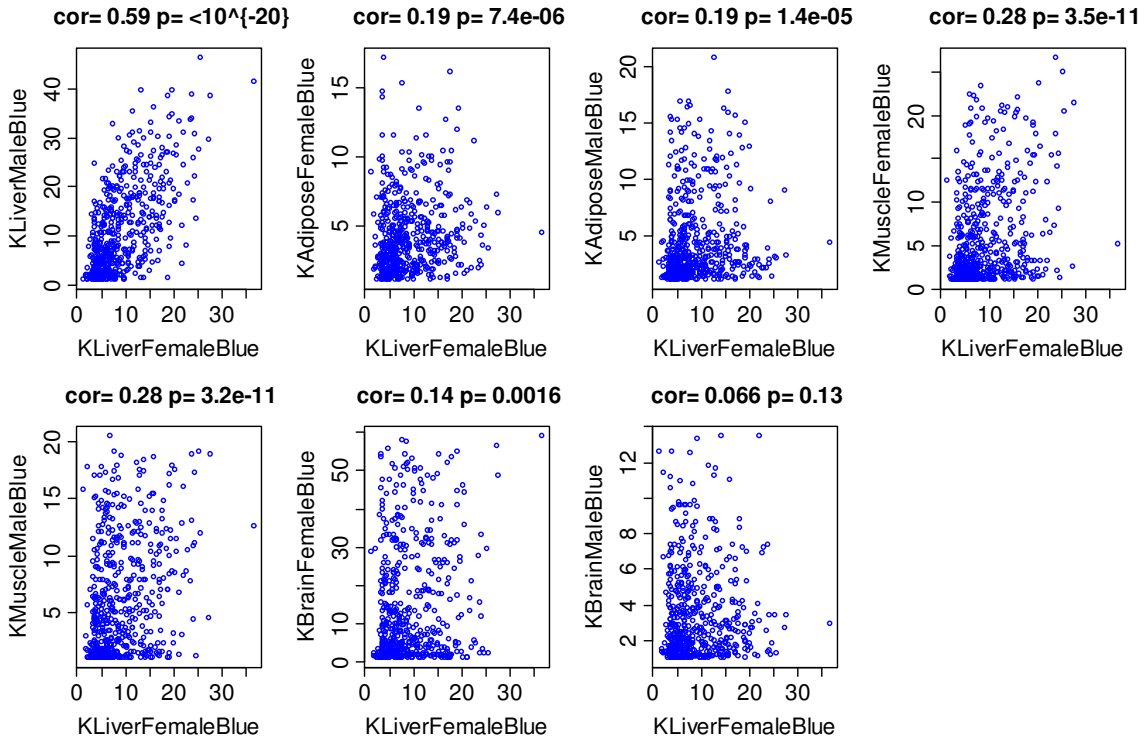

Supplement: pgen.0020130.sg002.pdf [file pgen.0020130.sg002.pdf]
