# Supplementary material
Source: PubMed Central journal article supplement (PMC1555618)

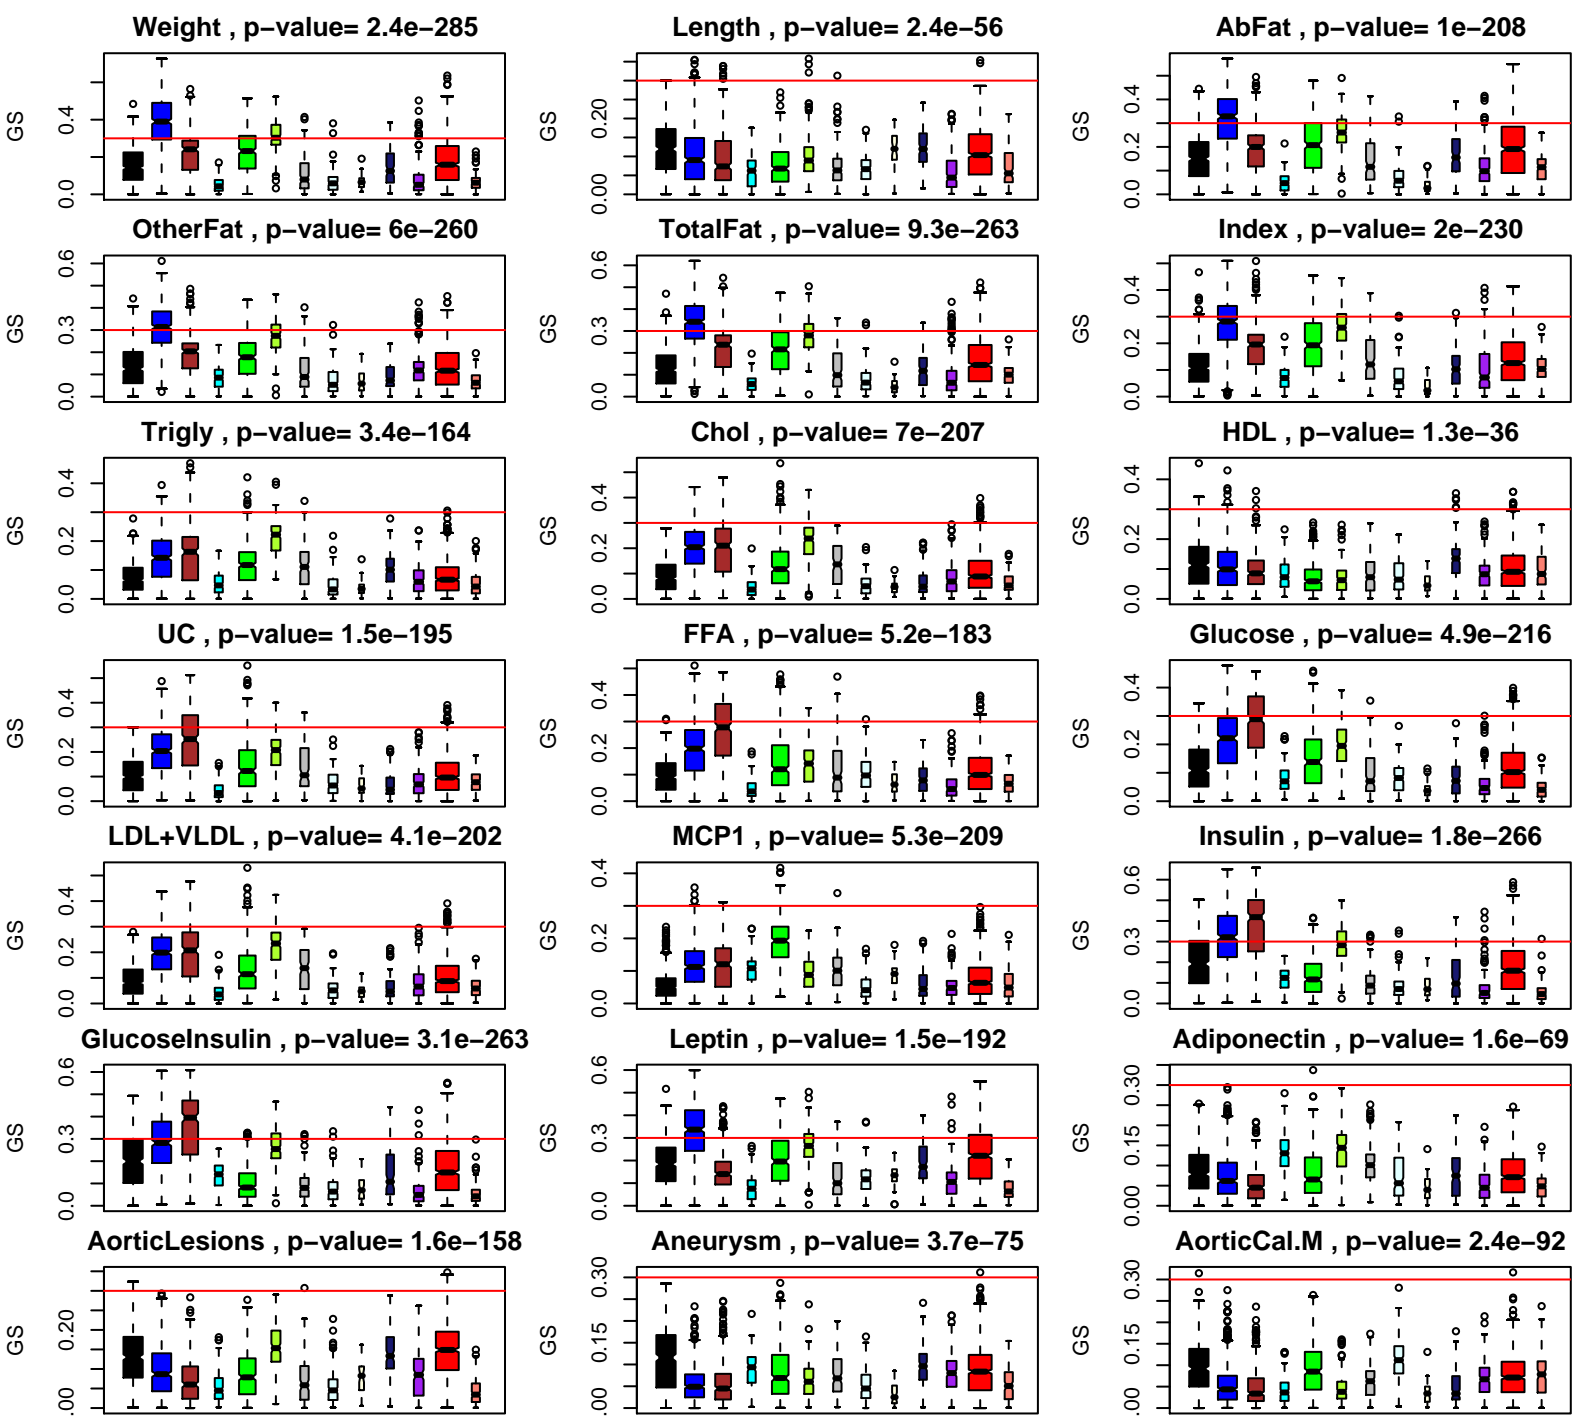

Supplement: pgen.0020130.sg001.pdf [file pgen.0020130.sg001.pdf]

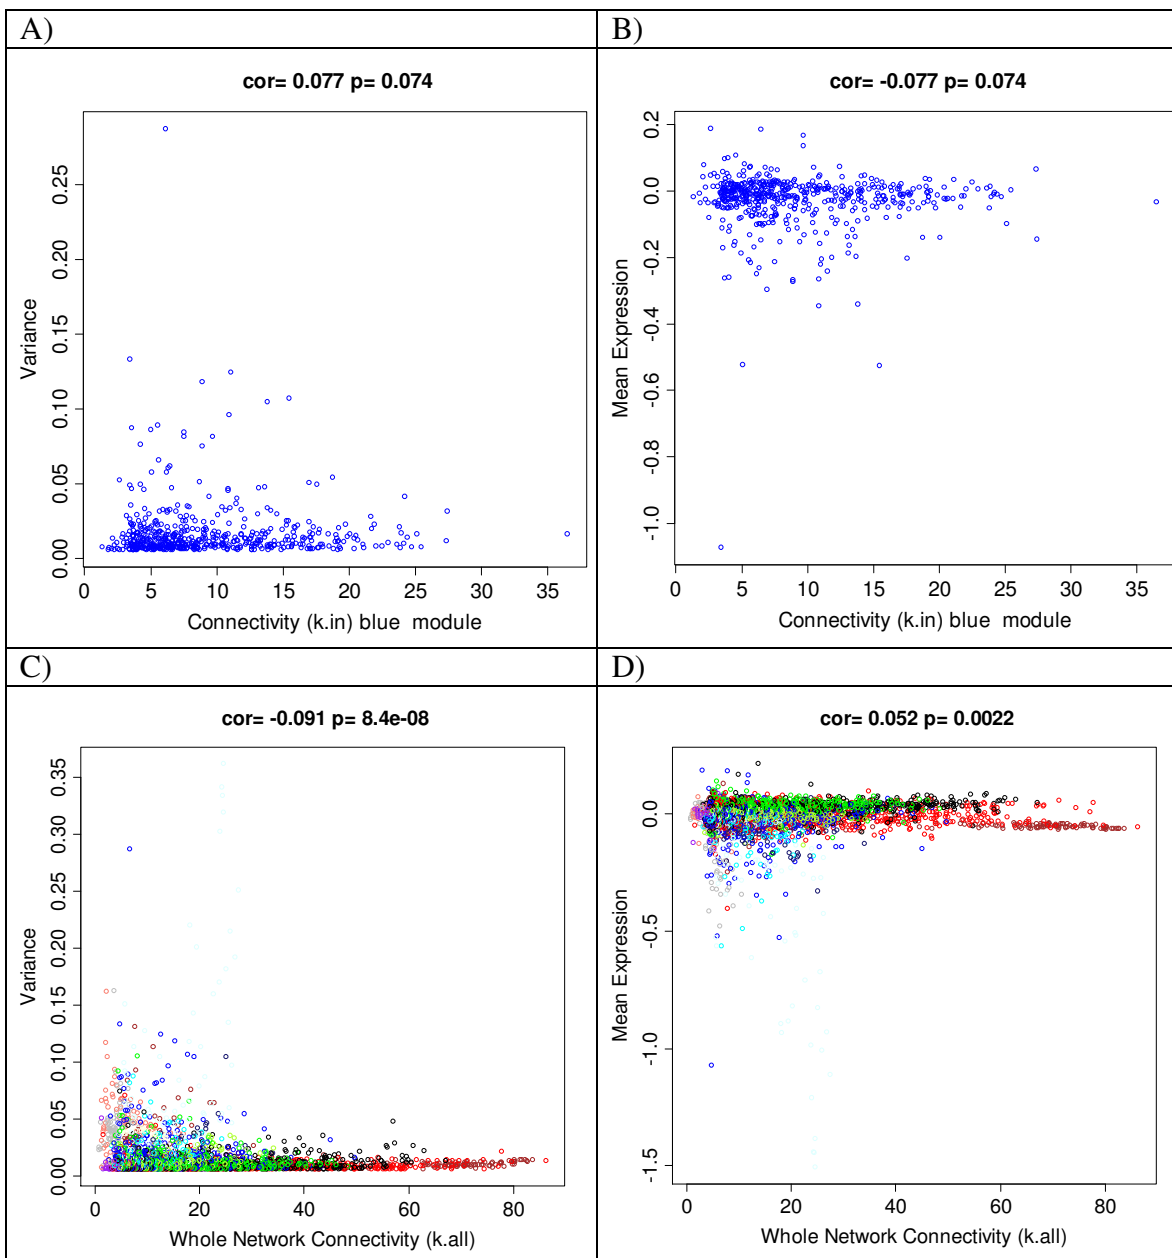

Supplement: pgen.0020130.sg003.pdf [file pgen.0020130.sg003.pdf]

Supplementary Figure S4.

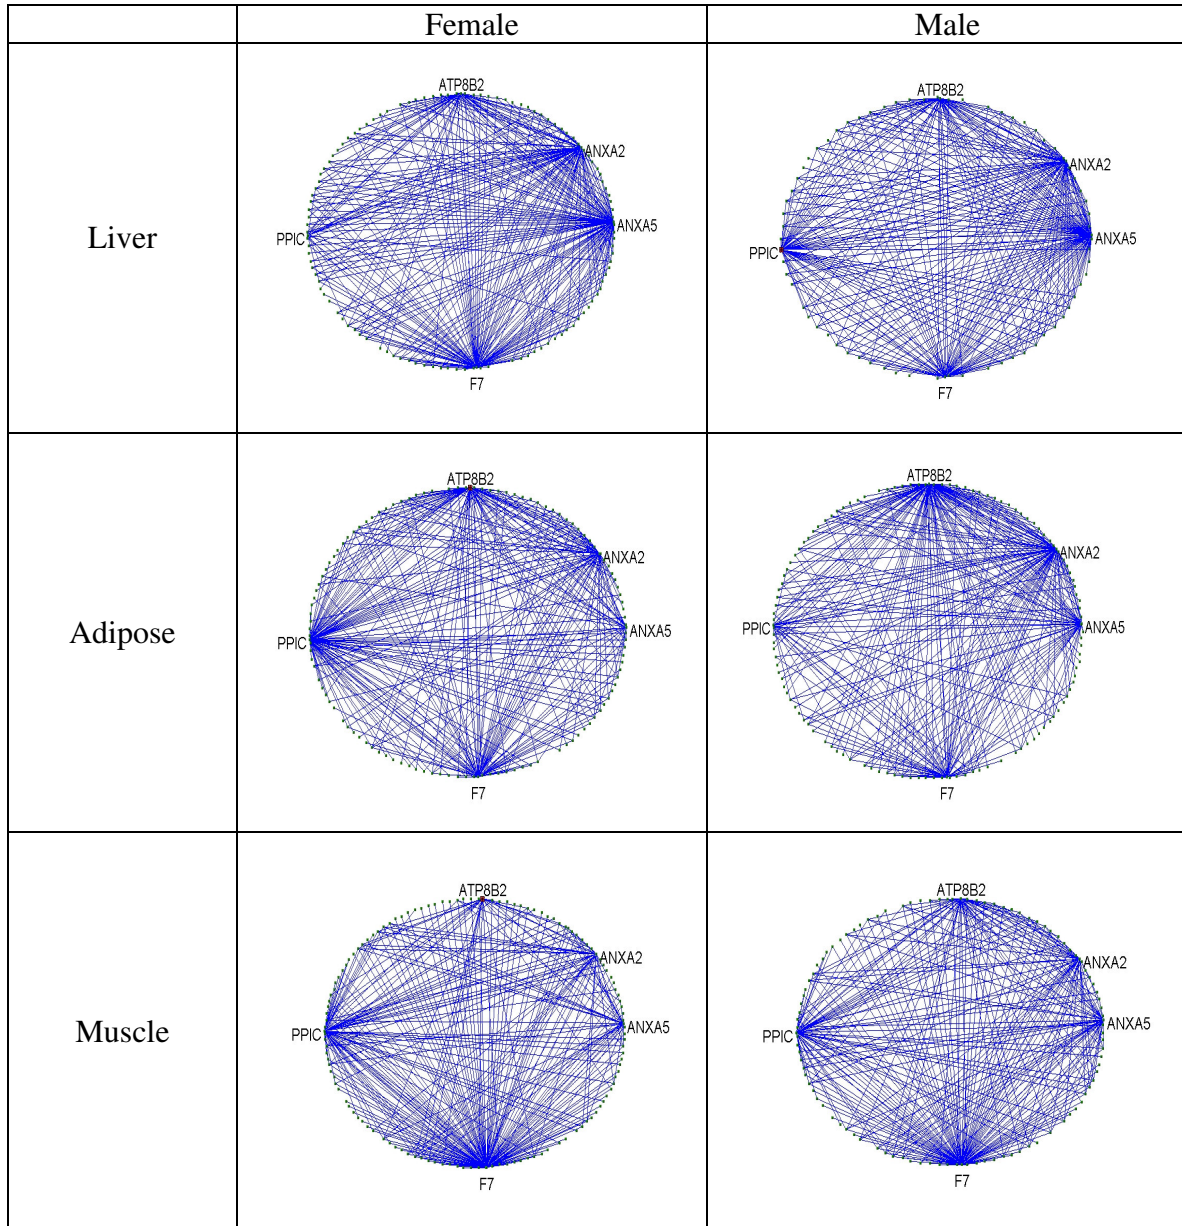

Supplement: pgen.0020130.sg004.pdf [file pgen.0020130.sg004.pdf]

**beta= 6 , scale free R^2= 0.88 , slope= -1.61 , trunc.R^2= 0.98**

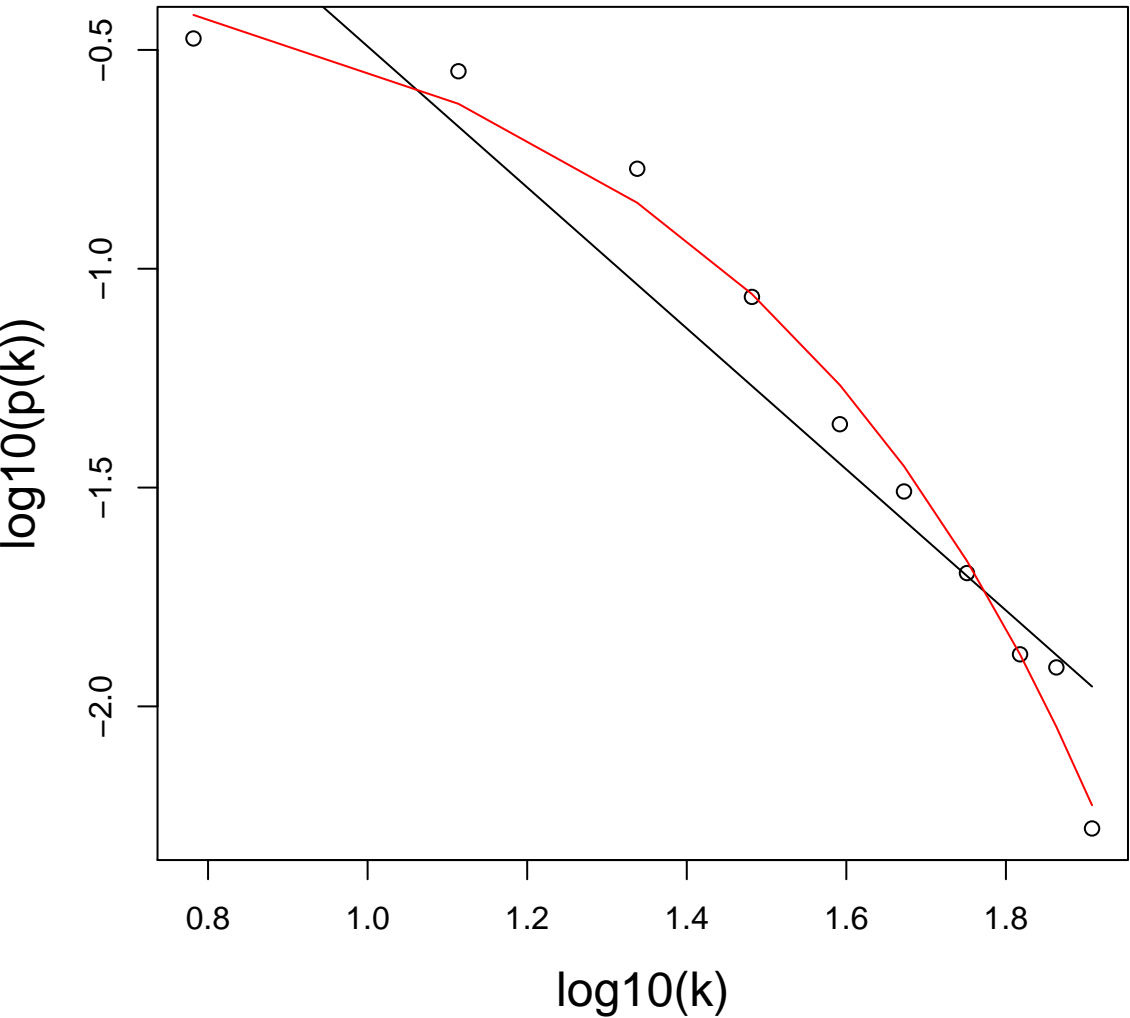

Supplement: pgen.0020130.sg005.pdf [file pgen.0020130.sg005.pdf]
